# Supplementary material for: Modelling the interaction processes between nanoparticles and biomacromolecules of variable hydrophobicity: Monte Carlo simulations
Source: Royal Society of Chemistry journal article supplement (doi:10.1039/c5en00054h), 2015-01-01
Supplement: c5en00054h1.pdf [file c5en00054h1.pdf]

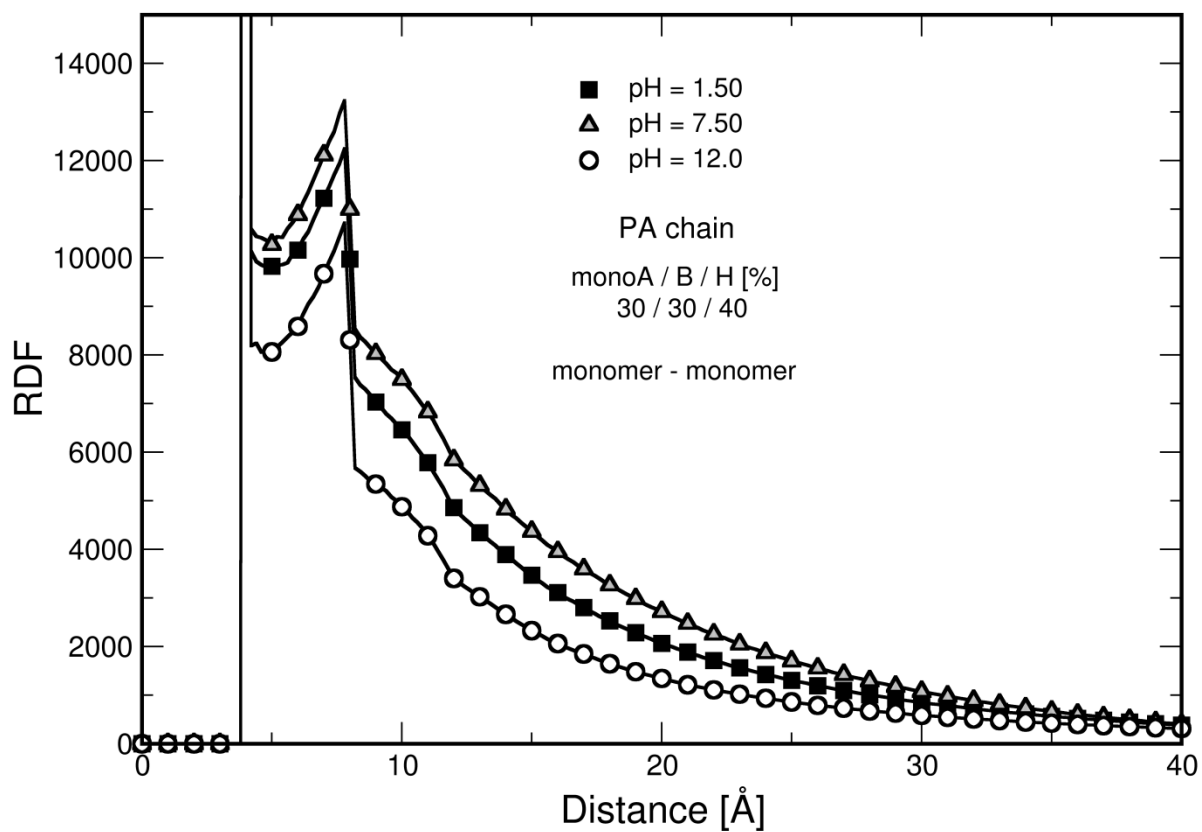

**S1.** Monomer – monomer Radial Distribution Function of a random polymer chain at different pH values.

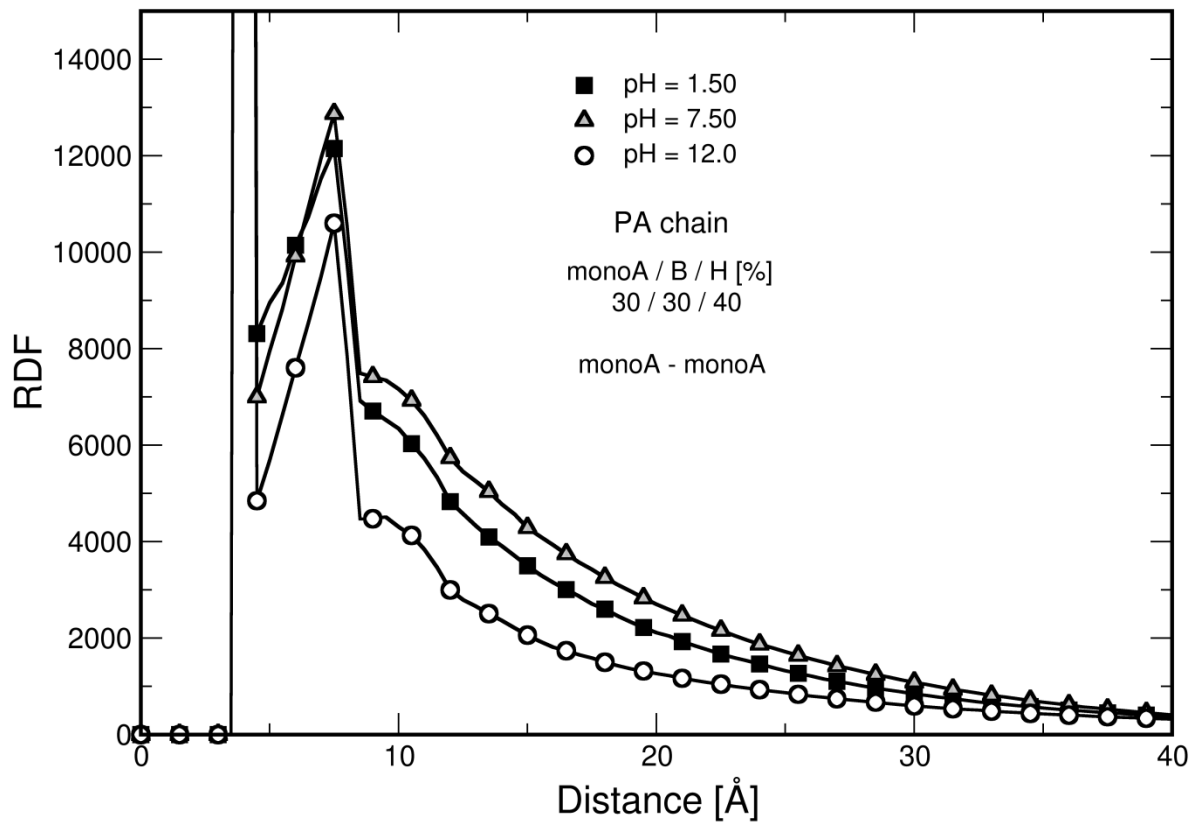

**S2.** Monomer A – monomer A, Radial Distribution Function of a random polymer chain at different pH values.

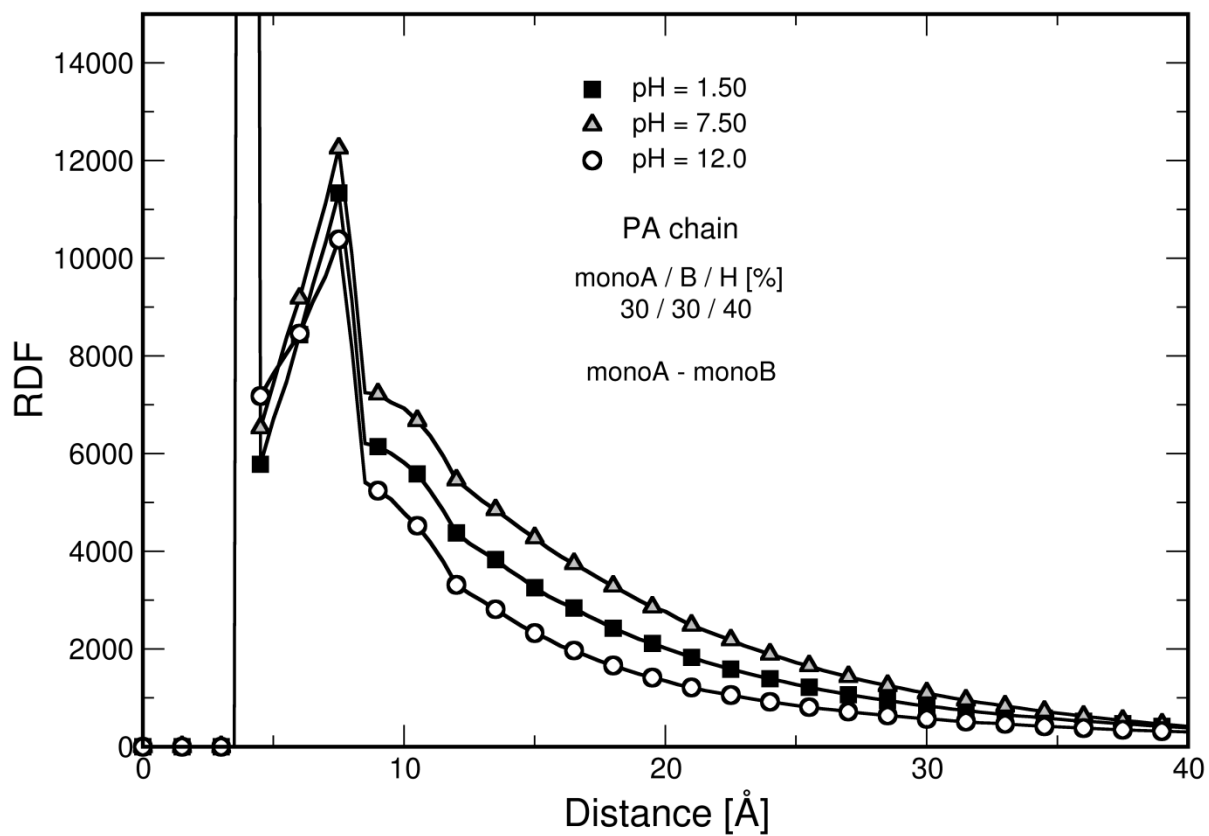

**S3.** Monomer A – monomer B, Radial Distribution Function of a random polymer chain at different pH values.

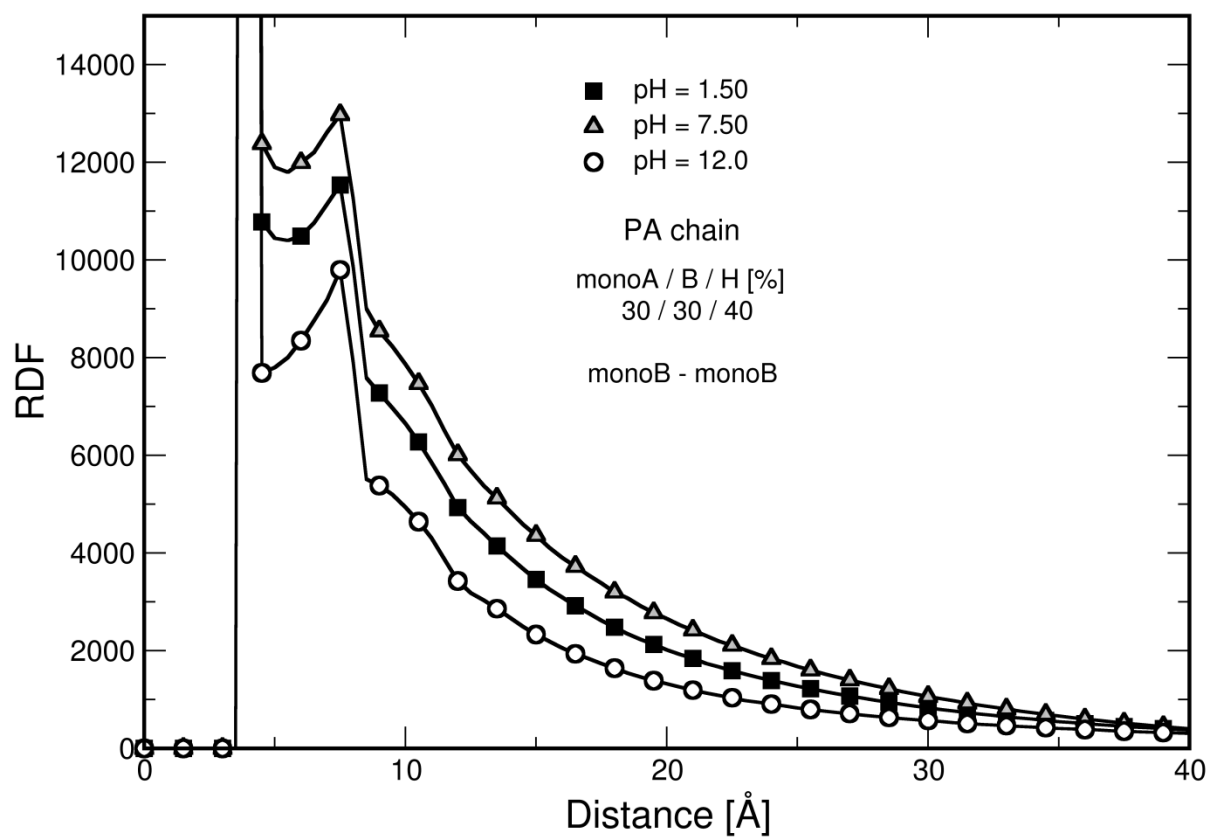

**S4.** Monomer B – monomer B, Radial Distribution Function of a random polymer chain at different pH values.

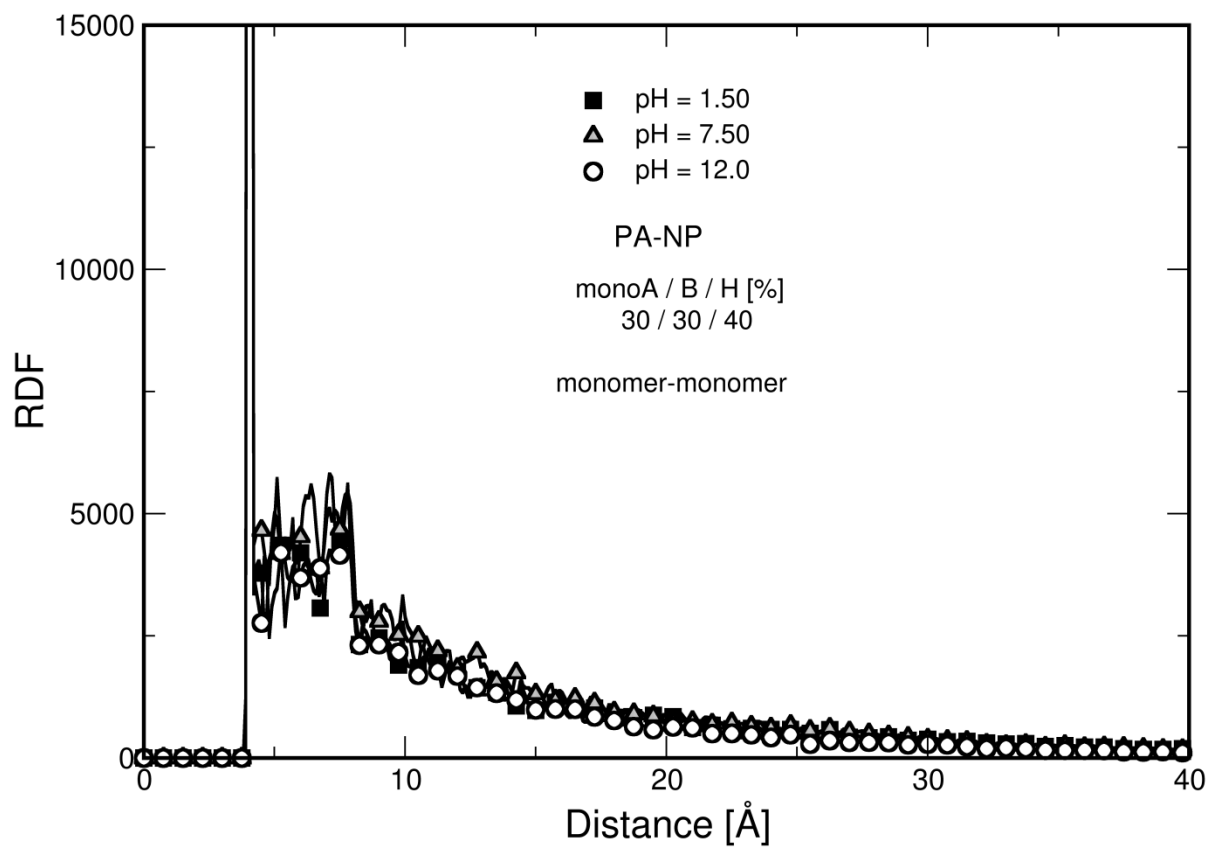

**S5.** Monomer – monomer, Radial Distribution Function of a random polymer chain at different pH values and in the presence of the NP.

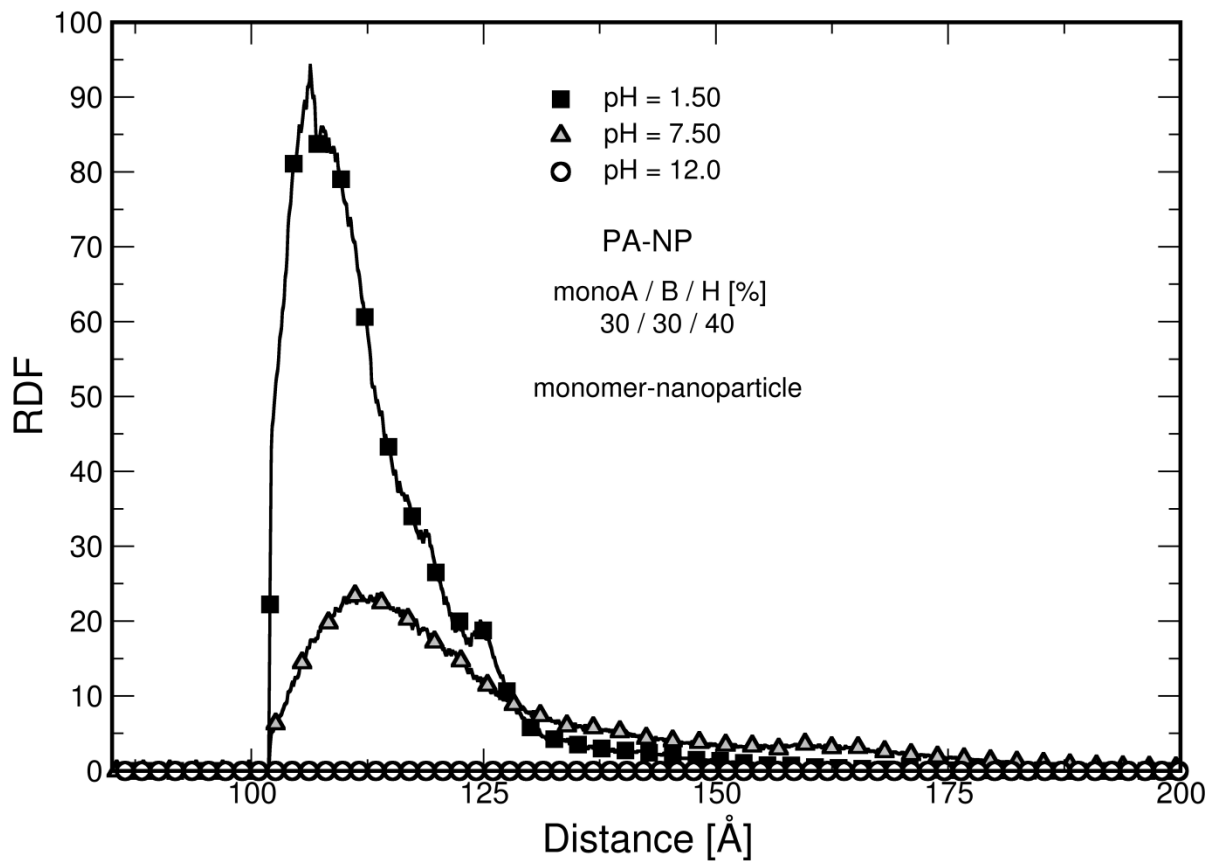

**S6.** Monomer – nanoparticle, Radial Distribution Function of a random polymer chain at different pH values and in the presence of the NP.
